# Supplementary material for: Insights into the corrosion inhibition of copper in hydrochloric acid solution by self-assembled films of 4-octylphenol
Source: Royal Society of Chemistry journal article supplement (doi:10.1039/c5ra13074c), 2015-01-01
Supplement: c5ra13074c1.pdf [file c5ra13074c1.pdf]

## Electronic Supplementary Information

### **Insights on the corrosion inhibition of copper in hydrochloric acid solution by the self-assembled film of 4-octylphenol**

Shi Mo, Ting Ting Qin, Hong Qun Luo and Nian Bing Li\*

*Key Laboratory of Eco-environments in Three Gorges Reservoir Region (Ministry of Education), School of Chemistry and Chemical Engineering, Southwest University, Chongqing 400715, China*

*\*Corresponding author. Tel: +86 23-68253237, Fax: +86 23-68253237.*

*E-mail address: [linb@swu.edu.cn](mailto:linb@swu.edu.cn).*

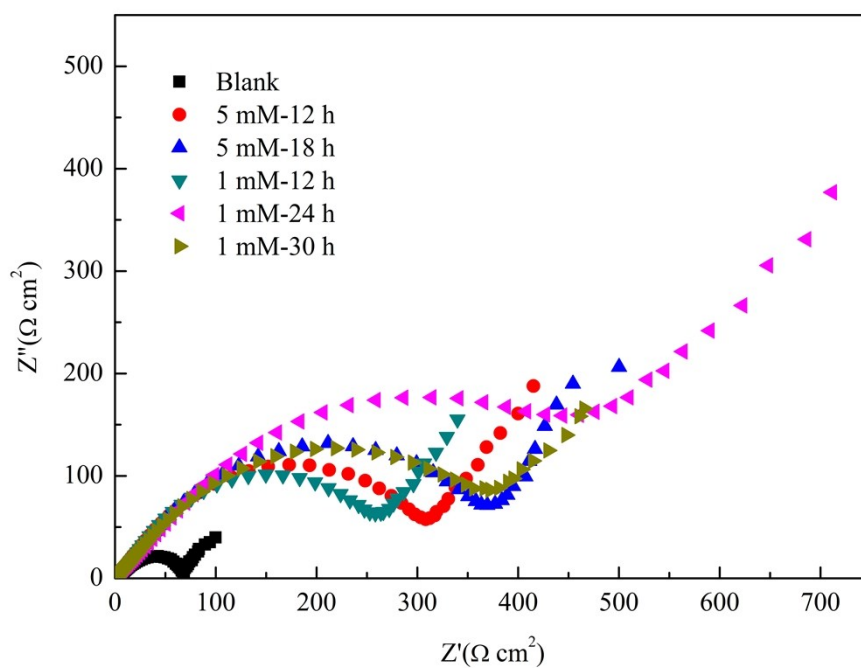

**Fig. S1** Nyquist plots in 0.5 M HCl for the blank copper and OP covered copper electrodes immersed in 1.0 and 5.0 mM OP solution for different time

**Table S1** Impedance parameters for the blank copper and copper electrodes self-assembled in 1.0 and 5.0 mM OP solution for different time in 0.5 M HCl solution.

| $C-t$<br>(mM-h) | $Q_f$<br>( $\mu\text{S s}^n$<br>$\text{cm}^{-2}$ ) | $n_1$ | $R_f$<br>( $\Omega \text{ cm}^2$ ) | $Q_{dl}$<br>( $\mu\text{S s}^n$<br>$\text{cm}^{-2}$ ) | $n_2$ | $R_{ct}$<br>( $\Omega \text{ cm}^2$ ) | $W$<br>( $\text{m}\Omega \text{ cm}^2$ ) | $\eta_R$<br>(%) |
|-----------------|----------------------------------------------------|-------|------------------------------------|-------------------------------------------------------|-------|---------------------------------------|------------------------------------------|-----------------|
| 0               | —                                                  | —     | —                                  | 1452                                                  | 0.60  | 69.5                                  | 101                                      | —               |
| 5-12            | 488.7                                              | 0.71  | 24.4                               | 414.2                                                 | 0.82  | 252.4                                 | 18.2                                     | 74.9            |
| 5-18            | 507.9                                              | 0.68  | 38.1                               | 420.4                                                 | 0.83  | 292.3                                 | 15.8                                     | 79.0            |
| 1-12            | 743.4                                              | 0.67  | 11.2                               | 982.5                                                 | 0.81  | 220.8                                 | 21.6                                     | 70.0            |
| 1-24            | 665.8                                              | 0.73  | 34.6                               | 192.5                                                 | 0.83  | 472.1                                 | 18.1                                     | 86.3            |
| 1-30            | 312.9                                              | 0.74  | 21.1                               | 655.2                                                 | 0.68  | 331.5                                 | 22.3                                     | 80.3            |
